# Supplementary material for: Exploring profile and potential influencers of vaginal microbiome among asymptomatic pregnant Chinese women
Source: PeerJ. 2019 Dec 10;7:e8172. doi: 10.7717/peerj.8172 (PMC6910115; doi:10.7717/peerj.8172)
Supplement: File S1 [file peerj-07-8172-s006.xlsx]

## Sheet: Taxonomy
ASV_ID	Taxonomy
ASV1	Bacteria;Firmicutes;Bacilli;Lactobacillales;Lactobacillaceae;Lactobacillus;crispatus
ASV2	Bacteria;Firmicutes;Bacilli;Lactobacillales;Lactobacillaceae;Lactobacillus;iners
ASV3	Bacteria;Firmicutes;Bacilli;Lactobacillales;Lactobacillaceae;Lactobacillus;gasseri
ASV4	Bacteria;Firmicutes;Bacilli;Lactobacillales;Lactobacillaceae;Lactobacillus;jensenii
ASV5	Bacteria;Firmicutes;Negativicutes;Selenomonadales;Veillonellaceae;Megasphaera;NA
ASV6	Bacteria;Firmicutes;Bacilli;Lactobacillales;Lactobacillaceae;Lactobacillus;reuteri
ASV7	Bacteria;Firmicutes;Negativicutes;Selenomonadales;Veillonellaceae;Dialister;NA
ASV8	Bacteria;Firmicutes;Bacilli;Lactobacillales;Aerococcaceae;Aerococcus;christensenii
ASV9	Bacteria;Bacteroidetes;Bacteroidia;Bacteroidales;Prevotellaceae;Prevotella;NA
ASV10	Bacteria;Firmicutes;Bacilli;Lactobacillales;NA;NA;NA
ASV11	Bacteria;Firmicutes;Negativicutes;Selenomonadales;Veillonellaceae;Dialister;NA
ASV12	Bacteria;Actinobacteria;Actinobacteria;Bifidobacteriales;Bifidobacteriaceae;Gardnerella;NA
ASV13	Bacteria;Proteobacteria;Gammaproteobacteria;Pseudomonadales;Pseudomonadaceae;Pseudomonas;NA
ASV14	Bacteria;Firmicutes;Bacilli;Bacillales;Family_XI;Gemella;NA
ASV15	Bacteria;Actinobacteria;Actinobacteria;Bifidobacteriales;Bifidobacteriaceae;Gardnerella;NA
ASV16	Bacteria;Firmicutes;Bacilli;Lactobacillales;Enterococcaceae;Enterococcus;NA
ASV17	Bacteria;Tenericutes;Mollicutes;Mycoplasmatales;Mycoplasmataceae;Ureaplasma;NA
ASV18	Bacteria;Proteobacteria;Gammaproteobacteria;Pseudomonadales;Pseudomonadaceae;Pseudomonas;NA
ASV19	Bacteria;Firmicutes;Negativicutes;Selenomonadales;Veillonellaceae;Dialister;NA
ASV20	Bacteria;Tenericutes;Mollicutes;Mycoplasmatales;Mycoplasmataceae;Mycoplasma;spermatophilum
ASV21	Bacteria;Proteobacteria;Gammaproteobacteria;Xanthomonadales;Xanthomonadaceae;Stenotrophomonas;maltophilia
ASV22	Bacteria;Firmicutes;Bacilli;Lactobacillales;Lactobacillaceae;Lactobacillus;buchneri
ASV23	Bacteria;Proteobacteria;Gammaproteobacteria;Pseudomonadales;Moraxellaceae;Acinetobacter;NA
ASV24	Bacteria;Firmicutes;Bacilli;Lactobacillales;Lactobacillaceae;Lactobacillus;sp.06
ASV25	Bacteria;Firmicutes;Negativicutes;Selenomonadales;Veillonellaceae;Megasphaera;NA
ASV26	Bacteria;Proteobacteria;Gammaproteobacteria;Pseudomonadales;Pseudomonadaceae;Pseudomonas;NA
ASV27	Bacteria;Firmicutes;Bacilli;Lactobacillales;Streptococcaceae;Lactococcus;NA
ASV28	Bacteria;Firmicutes;Bacilli;Lactobacillales;Lactobacillaceae;Lactobacillus;coleohominis
ASV29	Bacteria;Proteobacteria;Gammaproteobacteria;Betaproteobacteriales;Burkholderiaceae;Ralstonia;NA
ASV30	Bacteria;Firmicutes;Bacilli;Lactobacillales;Lactobacillaceae;Lactobacillus;crispatus
ASV31	Bacteria;Firmicutes;Bacilli;Lactobacillales;Lactobacillaceae;Lactobacillus;crispatus
ASV32	Bacteria;Firmicutes;Bacilli;Lactobacillales;Streptococcaceae;Streptococcus;NA
ASV33	Bacteria;Firmicutes;Bacilli;Bacillales;Bacillaceae;Bacillus;NA
ASV34	Bacteria;Firmicutes;Bacilli;Lactobacillales;Carnobacteriaceae;Atopostipes;NA
ASV35	Bacteria;Firmicutes;Negativicutes;Selenomonadales;Veillonellaceae;Dialister;NA
ASV36	Bacteria;Firmicutes;Negativicutes;Selenomonadales;Veillonellaceae;Dialister;NA
ASV37	Bacteria;Bacteroidetes;Bacteroidia;Cytophagales;Microscillaceae;NA;NA
ASV38	Bacteria;Firmicutes;Bacilli;Lactobacillales;Lactobacillaceae;Lactobacillus;iners
ASV39	Bacteria;Proteobacteria;Gammaproteobacteria;Betaproteobacteriales;Rhodocyclaceae;Dechloromonas;NA
ASV40	Bacteria;Proteobacteria;Gammaproteobacteria;Betaproteobacteriales;Rhodocyclaceae;Dechloromonas;NA
ASV41	Bacteria;Firmicutes;Bacilli;Lactobacillales;Lactobacillaceae;Lactobacillus;sp.03
ASV42	Bacteria;Firmicutes;Bacilli;Lactobacillales;NA;NA;NA
ASV43	Bacteria;Firmicutes;Bacilli;NA;NA;NA;NA
ASV44	Bacteria;Proteobacteria;Gammaproteobacteria;Pseudomonadales;Pseudomonadaceae;Pseudomonas;NA
ASV45	Bacteria;Firmicutes;Negativicutes;Selenomonadales;Veillonellaceae;Veillonella;montpellierensis
ASV46	Bacteria;Firmicutes;Bacilli;Lactobacillales;Streptococcaceae;Lactococcus;piscium
ASV47	Bacteria;Firmicutes;Bacilli;Lactobacillales;Streptococcaceae;Lactococcus;raffinolactis
ASV48	Bacteria;Firmicutes;Negativicutes;Selenomonadales;Veillonellaceae;Megasphaera;NA
ASV49	Bacteria;Bacteroidetes;Bacteroidia;Bacteroidales;Prevotellaceae;Prevotella;NA
ASV50	Bacteria;Proteobacteria;Gammaproteobacteria;Pseudomonadales;Moraxellaceae;Acinetobacter;NA
ASV51	Bacteria;Acidobacteria;Blastocatellia_(Subgroup_4);Blastocatellales;Blastocatellaceae;NA;NA
ASV52	Bacteria;Proteobacteria;Gammaproteobacteria;Xanthomonadales;Xanthomonadaceae;Stenotrophomonas;maltophilia
ASV53	Bacteria;Proteobacteria;Alphaproteobacteria;NA;NA;NA;NA
ASV54	Bacteria;Actinobacteria;Actinobacteria;Bifidobacteriales;Bifidobacteriaceae;NA;NA
ASV55	Bacteria;Firmicutes;Bacilli;Lactobacillales;Lactobacillaceae;Lactobacillus;fermentum
ASV56	Bacteria;Proteobacteria;Gammaproteobacteria;Enterobacteriales;Enterobacteriaceae;Serratia;NA
ASV57	Bacteria;Firmicutes;Clostridia;Clostridiales;Ruminococcaceae;Ruminococcus_2;NA
ASV58	Bacteria;Firmicutes;Bacilli;Lactobacillales;Lactobacillaceae;Lactobacillus;iners
ASV59	Bacteria;Firmicutes;Bacilli;NA;NA;NA;NA
ASV60	Bacteria;Proteobacteria;Gammaproteobacteria;Betaproteobacteriales;Rhodocyclaceae;Dechloromonas;NA
ASV61	Bacteria;Bacteroidetes;Bacteroidia;Bacteroidales;Prevotellaceae;Prevotella;NA
ASV62	Bacteria;Firmicutes;Bacilli;Lactobacillales;Lactobacillaceae;Lactobacillus;sp.04
ASV63	Bacteria;Bacteroidetes;Bacteroidia;Bacteroidales;Rikenellaceae;NA;NA
ASV64	Bacteria;Proteobacteria;Gammaproteobacteria;Pseudomonadales;Moraxellaceae;Acinetobacter;bohemicus
ASV65	Bacteria;Firmicutes;Bacilli;Lactobacillales;Lactobacillaceae;Lactobacillus;mucosae
ASV66	Bacteria;Proteobacteria;Alphaproteobacteria;Rhizobiales;NA;NA;NA
ASV67	Bacteria;Firmicutes;Bacilli;Lactobacillales;Lactobacillaceae;Lactobacillus;homohiochii
ASV68	Bacteria;Bacteroidetes;Bacteroidia;Cytophagales;Microscillaceae;NA;NA
ASV69	Bacteria;Firmicutes;Bacilli;Lactobacillales;Streptococcaceae;Streptococcus;NA
ASV70	Bacteria;Proteobacteria;Gammaproteobacteria;Pseudomonadales;Moraxellaceae;Acinetobacter;NA
ASV71	Bacteria;Tenericutes;Mollicutes;Mycoplasmatales;Mycoplasmataceae;Mycoplasma;NA
ASV72	Bacteria;Bacteroidetes;Bacteroidia;Bacteroidales;NA;NA;NA
ASV73	Bacteria;Firmicutes;Bacilli;Lactobacillales;Lactobacillaceae;Lactobacillus;sp.06
ASV74	Bacteria;Actinobacteria;Actinobacteria;Corynebacteriales;Corynebacteriaceae;NA;NA
ASV75	Bacteria;Firmicutes;Bacilli;Lactobacillales;NA;NA;NA
ASV76	Bacteria;Firmicutes;Bacilli;Bacillales;Staphylococcaceae;Staphylococcus;NA
ASV77	Bacteria;Firmicutes;Bacilli;Lactobacillales;Streptococcaceae;Lactococcus;raffinolactis
ASV78	Bacteria;Bacteroidetes;Bacteroidia;Bacteroidales;NA;NA;NA
ASV79	Bacteria;Firmicutes;Bacilli;Lactobacillales;Lactobacillaceae;Lactobacillus;salivarius
ASV80	Bacteria;Proteobacteria;Gammaproteobacteria;Xanthomonadales;Xanthomonadaceae;Stenotrophomonas;NA
ASV81	Bacteria;Proteobacteria;Gammaproteobacteria;Betaproteobacteriales;Rhodocyclaceae;Dechloromonas;NA
ASV82	Bacteria;Proteobacteria;Alphaproteobacteria;Rhizobiales;NA;NA;NA
ASV83	Bacteria;Firmicutes;Bacilli;Lactobacillales;Aerococcaceae;Aerococcus;NA
ASV84	Bacteria;Proteobacteria;Gammaproteobacteria;Xanthomonadales;Xanthomonadaceae;Luteimonas;NA
ASV85	Bacteria;Firmicutes;Clostridia;Clostridiales;Ruminococcaceae;Ruminococcus_2;NA
ASV86	Bacteria;Firmicutes;Bacilli;Lactobacillales;Lactobacillaceae;Lactobacillus;murinus
ASV87	Bacteria;Proteobacteria;Gammaproteobacteria;Pseudomonadales;Pseudomonadaceae;Pseudomonas;NA
ASV88	Bacteria;Bacteroidetes;Bacteroidia;Bacteroidales;Prevotellaceae;Prevotella;NA
ASV89	Bacteria;Proteobacteria;Alphaproteobacteria;Rhizobiales;Rhizobiaceae;NA;NA
ASV90	Bacteria;Proteobacteria;Gammaproteobacteria;Pseudomonadales;Pseudomonadaceae;Pseudomonas;NA
ASV91	Bacteria;Firmicutes;Bacilli;Lactobacillales;Streptococcaceae;Streptococcus;NA
ASV92	Bacteria;Firmicutes;Bacilli;Bacillales;Staphylococcaceae;Staphylococcus;NA
ASV93	Bacteria;Proteobacteria;Gammaproteobacteria;Enterobacteriales;Enterobacteriaceae;Providencia;NA
ASV94	Bacteria;Firmicutes;Bacilli;Lactobacillales;Aerococcaceae;Aerococcus;christensenii
ASV95	Bacteria;Bacteroidetes;Bacteroidia;Bacteroidales;Prevotellaceae;Prevotella;NA
ASV96	Bacteria;Firmicutes;Bacilli;Bacillales;Staphylococcaceae;Staphylococcus;NA
ASV97	Bacteria;Firmicutes;Bacilli;Lactobacillales;Lactobacillaceae;Lactobacillus;intestinalis
ASV98	Bacteria;Firmicutes;Bacilli;NA;NA;NA;NA
ASV99	Bacteria;Proteobacteria;Alphaproteobacteria;Rhizobiales;Rhizobiaceae;NA;NA
ASV100	Bacteria;Bacteroidetes;Bacteroidia;Bacteroidales;Prevotellaceae;Prevotella;NA
ASV101	Bacteria;Bacteroidetes;Bacteroidia;Bacteroidales;Prevotellaceae;Prevotella;NA
ASV102	Bacteria;Firmicutes;Bacilli;Lactobacillales;Streptococcaceae;Streptococcus;NA
ASV103	Bacteria;Proteobacteria;Alphaproteobacteria;NA;NA;NA;NA
ASV104	Bacteria;Bacteroidetes;Bacteroidia;Bacteroidales;NA;NA;NA
ASV105	Bacteria;Proteobacteria;Gammaproteobacteria;Betaproteobacteriales;Burkholderiaceae;Parasutterella;excrementihominis
ASV106	Bacteria;Proteobacteria;Gammaproteobacteria;Betaproteobacteriales;Burkholderiaceae;Roseateles;depolymerans
ASV107	Bacteria;Firmicutes;Bacilli;Lactobacillales;Streptococcaceae;Streptococcus;NA
ASV108	Bacteria;Bacteroidetes;Bacteroidia;Bacteroidales;NA;NA;NA
ASV109	Bacteria;Proteobacteria;Gammaproteobacteria;Betaproteobacteriales;Burkholderiaceae;Delftia;NA
ASV110	Bacteria;NA;NA;NA;NA;NA;NA
ASV111	Bacteria;Bacteroidetes;Bacteroidia;Bacteroidales;Prevotellaceae;Prevotella;NA
ASV112	Bacteria;Proteobacteria;Alphaproteobacteria;Rhizobiales;Rhizobiaceae;NA;NA
ASV113	Bacteria;Firmicutes;Bacilli;Lactobacillales;Lactobacillaceae;Lactobacillus;crispatus
ASV114	Bacteria;Firmicutes;Bacilli;Lactobacillales;Streptococcaceae;Streptococcus;NA
ASV115	Bacteria;Actinobacteria;Rubrobacteria;Rubrobacterales;Rubrobacteriaceae;Rubrobacter;NA
ASV116	Bacteria;Bacteroidetes;Bacteroidia;Flavobacteriales;Weeksellaceae;Soonwooa;NA
ASV117	Bacteria;Firmicutes;Bacilli;Lactobacillales;NA;NA;NA
ASV118	Bacteria;Firmicutes;Bacilli;Lactobacillales;Lactobacillaceae;Lactobacillus;salivarius
ASV119	Bacteria;Firmicutes;Bacilli;Bacillales;Planococcaceae;Solibacillus;NA
ASV120	Bacteria;Proteobacteria;Gammaproteobacteria;Betaproteobacteriales;Burkholderiaceae;Paucibacter;NA
ASV121	Bacteria;Fusobacteria;Fusobacteriia;Fusobacteriales;Leptotrichiaceae;Sneathia;NA
ASV122	Bacteria;Firmicutes;Bacilli;Lactobacillales;Lactobacillaceae;Lactobacillus;iners
ASV123	Bacteria;Proteobacteria;Alphaproteobacteria;Sphingomonadales;Sphingomonadaceae;Parablastomonas;NA
ASV124	Bacteria;Firmicutes;Bacilli;Lactobacillales;Streptococcaceae;Lactococcus;raffinolactis
ASV125	Bacteria;Bacteroidetes;Bacteroidia;Sphingobacteriales;Sphingobacteriaceae;Sphingobacterium;NA
ASV126	Bacteria;Bacteroidetes;Bacteroidia;Flavobacteriales;Flavobacteriaceae;Citreitalea;NA
ASV127	Bacteria;Firmicutes;Bacilli;Lactobacillales;Lactobacillaceae;Lactobacillus;sp.06
ASV128	Bacteria;Spirochaetes;Spirochaetia;Spirochaetales;Spirochaetaceae;Treponema_2;NA
ASV129	Bacteria;Firmicutes;Bacilli;Lactobacillales;Aerococcaceae;Facklamia;hominis
ASV130	Bacteria;Firmicutes;Clostridia;Clostridiales;Ruminococcaceae;NA;NA
ASV131	Bacteria;Acidobacteria;Blastocatellia_(Subgroup_4);NA;NA;NA;NA
ASV132	Bacteria;Proteobacteria;Gammaproteobacteria;Enterobacteriales;Enterobacteriaceae;NA;NA
ASV133	Bacteria;Proteobacteria;Gammaproteobacteria;Betaproteobacteriales;Rhodocyclaceae;Candidatus_Accumulibacter;NA
ASV134	Bacteria;Fusobacteria;Fusobacteriia;Fusobacteriales;Leptotrichiaceae;Sneathia;NA
ASV135	Bacteria;Proteobacteria;Gammaproteobacteria;Betaproteobacteriales;Burkholderiaceae;Sutterella;NA
ASV136	Bacteria;Bacteroidetes;Bacteroidia;Chitinophagales;Chitinophagaceae;NA;NA
ASV137	Bacteria;Firmicutes;Bacilli;Lactobacillales;Lactobacillaceae;Lactobacillus;helveticus
ASV138	Bacteria;Firmicutes;Bacilli;Lactobacillales;Lactobacillaceae;Lactobacillus;crispatus
ASV139	Bacteria;Firmicutes;Bacilli;Lactobacillales;Lactobacillaceae;Lactobacillus;crispatus
ASV140	Bacteria;Fusobacteria;Fusobacteriia;Fusobacteriales;Leptotrichiaceae;Sneathia;NA
ASV141	Bacteria;Proteobacteria;Alphaproteobacteria;Sphingomonadales;Sphingomonadaceae;Plot4-2H12;NA
ASV142	Bacteria;Firmicutes;Bacilli;Lactobacillales;Lactobacillaceae;Lactobacillus;homohiochii
ASV143	Bacteria;Proteobacteria;Gammaproteobacteria;Pseudomonadales;Moraxellaceae;Acinetobacter;haemolyticus
ASV144	Bacteria;Firmicutes;Bacilli;Lactobacillales;Streptococcaceae;Streptococcus;NA
ASV145	Bacteria;Proteobacteria;Gammaproteobacteria;Enterobacteriales;Enterobacteriaceae;Klebsiella;NA
ASV146	Bacteria;Proteobacteria;Gammaproteobacteria;Pseudomonadales;Pseudomonadaceae;Pseudomonas;NA
ASV147	Bacteria;Firmicutes;Negativicutes;Selenomonadales;Veillonellaceae;Dialister;NA
ASV148	Bacteria;Proteobacteria;Alphaproteobacteria;Sphingomonadales;Sphingomonadaceae;Parablastomonas;NA
ASV149	Bacteria;Proteobacteria;Deltaproteobacteria;Desulfovibrionales;Desulfovibrionaceae;NA;NA
ASV150	Bacteria;Proteobacteria;Gammaproteobacteria;Betaproteobacteriales;Burkholderiaceae;Noviherbaspirillum;NA
ASV151	Bacteria;Proteobacteria;Gammaproteobacteria;Pseudomonadales;Moraxellaceae;Acinetobacter;NA
ASV152	Bacteria;Bacteroidetes;Bacteroidia;Bacteroidales;NA;NA;NA
ASV153	Bacteria;Firmicutes;Negativicutes;Selenomonadales;Acidaminococcaceae;Phascolarctobacterium;NA
ASV154	Bacteria;Firmicutes;Bacilli;Lactobacillales;Lactobacillaceae;Lactobacillus;crispatus
ASV155	Bacteria;Proteobacteria;Gammaproteobacteria;Betaproteobacteriales;Burkholderiaceae;Ralstonia;NA
ASV156	Bacteria;Firmicutes;Bacilli;Lactobacillales;Leuconostocaceae;Leuconostoc;NA
ASV157	Bacteria;Tenericutes;Mollicutes;Mycoplasmatales;Mycoplasmataceae;Mycoplasma;spermatophilum
ASV158	Bacteria;Proteobacteria;Gammaproteobacteria;Betaproteobacteriales;Burkholderiaceae;Pseudoduganella;NA
ASV159	Bacteria;Bacteroidetes;Bacteroidia;Bacteroidales;Prevotellaceae;Prevotella;NA
ASV160	Bacteria;Firmicutes;Bacilli;Lactobacillales;Lactobacillaceae;Lactobacillus;sakei
ASV161	Bacteria;Firmicutes;Bacilli;Lactobacillales;Lactobacillaceae;Lactobacillus;crispatus
ASV162	Bacteria;Bacteroidetes;Bacteroidia;Bacteroidales;Prevotellaceae;Prevotella;NA
ASV163	Bacteria;Bacteroidetes;Bacteroidia;Bacteroidales;Barnesiellaceae;Barnesiella;NA
ASV164	Bacteria;Proteobacteria;Gammaproteobacteria;Betaproteobacteriales;Burkholderiaceae;Massilia;timonae
ASV165	Bacteria;Proteobacteria;Gammaproteobacteria;Betaproteobacteriales;Burkholderiaceae;Lampropedia;NA
ASV166	Bacteria;Proteobacteria;Alphaproteobacteria;NA;NA;NA;NA
ASV167	Bacteria;Firmicutes;Bacilli;NA;NA;NA;NA
ASV168	Bacteria;Proteobacteria;Gammaproteobacteria;Xanthomonadales;Xanthomonadaceae;Stenotrophomonas;NA
ASV169	Bacteria;Firmicutes;Bacilli;Bacillales;Bacillaceae;Bacillus;NA
ASV170	Bacteria;Firmicutes;Clostridia;Clostridiales;Ruminococcaceae;NA;NA
ASV171	Bacteria;Proteobacteria;Gammaproteobacteria;Pseudomonadales;Pseudomonadaceae;Pseudomonas;putida
ASV172	Bacteria;Proteobacteria;NA;NA;NA;NA;NA
ASV173	Bacteria;Firmicutes;Bacilli;Lactobacillales;Lactobacillaceae;Lactobacillus;iners
ASV174	Bacteria;Firmicutes;Bacilli;Bacillales;Bacillaceae;Virgibacillus;NA
ASV175	Bacteria;Proteobacteria;Gammaproteobacteria;Betaproteobacteriales;Burkholderiaceae;Massilia;timonae
ASV176	Bacteria;Firmicutes;Bacilli;Lactobacillales;Lactobacillaceae;Lactobacillus;iners
ASV177	Bacteria;Firmicutes;Bacilli;Lactobacillales;Lactobacillaceae;Lactobacillus;iners
ASV178	Bacteria;Bacteroidetes;Bacteroidia;Bacteroidales;NA;NA;NA
ASV179	Bacteria;Firmicutes;Clostridia;Clostridiales;Ruminococcaceae;NA;NA
ASV180	Bacteria;NA;NA;NA;NA;NA;NA
ASV181	Bacteria;Firmicutes;Bacilli;Bacillales;Staphylococcaceae;Staphylococcus;NA
ASV182	Bacteria;Proteobacteria;Alphaproteobacteria;NA;NA;NA;NA
ASV183	Bacteria;Bacteroidetes;Bacteroidia;Bacteroidales;NA;NA;NA
ASV184	Bacteria;Proteobacteria;Gammaproteobacteria;Pseudomonadales;Moraxellaceae;Enhydrobacter;aerosaccus
ASV185	Bacteria;Bacteroidetes;Bacteroidia;Bacteroidales;NA;NA;NA
ASV186	Bacteria;Firmicutes;Bacilli;Lactobacillales;Leuconostocaceae;Weissella;NA
ASV187	Bacteria;Firmicutes;Bacilli;Lactobacillales;Lactobacillaceae;Lactobacillus;crispatus
ASV188	Bacteria;Firmicutes;Bacilli;Bacillales;Bacillaceae;Bacillus;NA
ASV189	Bacteria;Firmicutes;NA;NA;NA;NA;NA
ASV190	Bacteria;Fusobacteria;Fusobacteriia;Fusobacteriales;Leptotrichiaceae;Sneathia;NA
ASV191	Bacteria;Proteobacteria;Gammaproteobacteria;Betaproteobacteriales;Rhodocyclaceae;Candidatus_Accumulibacter;NA
ASV192	Bacteria;Firmicutes;Clostridia;Clostridiales;Ruminococcaceae;Ruminococcus_2;NA
ASV193	Bacteria;Fusobacteria;Fusobacteriia;Fusobacteriales;Leptotrichiaceae;Sneathia;NA
ASV194	Bacteria;Proteobacteria;Gammaproteobacteria;Pseudomonadales;Moraxellaceae;Acinetobacter;NA
ASV195	Bacteria;Firmicutes;Bacilli;Bacillales;Bacillaceae;Bacillus;NA
ASV196	Bacteria;Bacteroidetes;Bacteroidia;Bacteroidales;Prevotellaceae;Prevotella;NA
ASV197	Bacteria;Firmicutes;Negativicutes;Selenomonadales;Veillonellaceae;Anaeroglobus;NA
ASV198	Bacteria;Proteobacteria;Alphaproteobacteria;Rhizobiales;Methylopilaceae;Albibacter;NA
ASV199	Bacteria;Firmicutes;Clostridia;Clostridiales;Ruminococcaceae;Ruminococcus_2;NA
ASV200	Bacteria;Proteobacteria;Gammaproteobacteria;Xanthomonadales;Xanthomonadaceae;Stenotrophomonas;NA
ASV201	Bacteria;NA;NA;NA;NA;NA;NA
ASV202	Bacteria;Firmicutes;Bacilli;Lactobacillales;Lactobacillaceae;Lactobacillus;crispatus
ASV203	Bacteria;Proteobacteria;Gammaproteobacteria;Xanthomonadales;Xanthomonadaceae;Lysobacter;NA
ASV204	Bacteria;Firmicutes;Bacilli;NA;NA;NA;NA
ASV205	Bacteria;Firmicutes;Bacilli;Lactobacillales;Lactobacillaceae;Lactobacillus;iners
ASV206	Bacteria;Bacteroidetes;Bacteroidia;Chitinophagales;Chitinophagaceae;NA;NA
ASV207	Bacteria;Proteobacteria;Gammaproteobacteria;Competibacterales;Competibacteraceae;Candidatus_Competibacter;NA
ASV208	Bacteria;Firmicutes;Bacilli;Lactobacillales;Streptococcaceae;Streptococcus;NA
ASV209	Bacteria;Proteobacteria;Gammaproteobacteria;Betaproteobacteriales;Burkholderiaceae;Burkholderia-Caballeronia-Paraburkholderia;NA
ASV210	Bacteria;Proteobacteria;Alphaproteobacteria;Sphingomonadales;Sphingomonadaceae;Parablastomonas;NA
ASV211	Bacteria;Proteobacteria;Gammaproteobacteria;Xanthomonadales;Xanthomonadaceae;Lysobacter;NA
ASV212	Bacteria;Firmicutes;Bacilli;NA;NA;NA;NA
ASV213	Bacteria;Firmicutes;Bacilli;Lactobacillales;Lactobacillaceae;Lactobacillus;plantarum
ASV214	Bacteria;Firmicutes;Bacilli;Lactobacillales;Carnobacteriaceae;Atopostipes;NA
ASV215	Bacteria;Acidobacteria;Blastocatellia_(Subgroup_4);Blastocatellales;Blastocatellaceae;NA;NA
ASV216	Bacteria;Bacteroidetes;Bacteroidia;Bacteroidales;Prevotellaceae;Prevotella;NA
ASV217	Eukaryota;NA;NA;NA;NA;NA;NA
ASV218	Bacteria;Firmicutes;Bacilli;Bacillales;Planococcaceae;NA;NA
ASV219	Bacteria;Firmicutes;Clostridia;Clostridiales;Ruminococcaceae;NA;NA
ASV220	Bacteria;Fusobacteria;Fusobacteriia;Fusobacteriales;Leptotrichiaceae;Sneathia;NA
ASV221	Bacteria;Firmicutes;Bacilli;Lactobacillales;Lactobacillaceae;Lactobacillus;sp.06
ASV222	Eukaryota;NA;NA;NA;NA;NA;NA
ASV223	Bacteria;Proteobacteria;Gammaproteobacteria;Enterobacteriales;Enterobacteriaceae;Rahnella;NA
ASV224	Bacteria;Proteobacteria;Gammaproteobacteria;Cellvibrionales;Cellvibrionaceae;Cellvibrio;NA
ASV225	Bacteria;Proteobacteria;Gammaproteobacteria;Competibacterales;Competibacteraceae;Candidatus_Competibacter;NA
ASV226	Bacteria;Bacteroidetes;Bacteroidia;Bacteroidales;Prevotellaceae;Prevotella;NA
ASV227	Bacteria;Bacteroidetes;Bacteroidia;Bacteroidales;Prevotellaceae;Prevotella;NA
ASV228	Bacteria;Bacteroidetes;Bacteroidia;Bacteroidales;NA;NA;NA
ASV229	Bacteria;Bacteroidetes;Bacteroidia;Bacteroidales;Barnesiellaceae;Barnesiella;NA
ASV230	Bacteria;Firmicutes;Bacilli;Lactobacillales;Streptococcaceae;Streptococcus;NA
